# Supplementary material for: Few-layer MoS2 promotes SnO2@C nano-composites for high performance sodium ion batteries
Source: Royal Society of Chemistry journal article supplement (doi:10.1039/d4dt02094d), 2024-01-01
Supplement: d4dt02094d1.pdf [file d4dt02094d1.pdf]

## Supplementary Information

### Few-layers MoS<sub>2</sub> promote SnO<sub>2</sub>@C nano-composites for high performance sodium ion battery

Zhilong Wu <sup>a,b,1</sup>, Zhiqiang Huang <sup>a,1</sup>, Maoxin Yu <sup>a,b</sup>, Yanan Du <sup>a</sup>, Junwen Li <sup>a</sup>, Hai Jia <sup>c</sup>,  
Zhiya Lin <sup>c,d</sup>, Xiaohui Huang <sup>a\*</sup> and Shaoming Ying <sup>a\*</sup>

a.

College of New Energy and Materials, Ningde Normal University, Fujian Provincial Key Laboratory of Featured Materials in Biochemical Industry, Ningde 352100, China.

b. College of Chemistry, Fuzhou University, Fuzhou 350002, China.

c. College of mathematics and Physics, Ningde Normal University, Ningde 352100, China.

d. College of Physics and Energy, Fujian Normal University, Fujian Provincial Solar Energy Conversion and Energy Storage Engineering Technology Research Center, Fuzhou 350117, China.

1. These authors contributed equally to this work.

\*Corresponding author:

Xiaohui Huang: 11429721@qq.com

Shaoming Ying E-mail: yingshaoming@126.com

---

## Experimental

### 1.1 Synthesis of SnO<sub>2</sub>@C composite precursor

SnO<sub>2</sub>@C was synthesized by a simple hydrothermal method and carbonization under high-temperature conditions. Typically, 1.89 g SnCl<sub>4</sub>·5H<sub>2</sub>O and 11.89 g glucose are thoroughly dissolved in 60 ml deionized (DI) water while stirring uniformly. Then, 0.85 ml of 12 mol L<sup>-1</sup> HCl is added to the above aqueous solution under stirring. After being continuously stirred for 30 min, the obtained suspension is transferred into a 100 mL Teflonlined stainless steel autoclave, sealed and maintained at 180 °C for 12 h. The brown precipitates are centrifuged and washed with deionized water and ethanol several times, and then dried in vacuum at 60 °C overnight. The dried product was heated to 500°C at a 3 °C min<sup>-1</sup> rate in an Ar atmosphere and calcined at 500°C for 3 h to obtain SnO<sub>2</sub>@C (SC).

### 1.2 Synthesis of Few-layered MoS<sub>2</sub>@SnO<sub>2</sub>@C composites

0.1g SC was dispersed in 70 ml mixed aqueous solutions of 0.15 g (NH<sub>4</sub>)<sub>6</sub>Mo<sub>7</sub>O<sub>24</sub>·4H<sub>2</sub>O and 0.3g CH<sub>4</sub>N<sub>2</sub>S, which was then sonicated for optimal dispersion. The solution was then transferred to a 100 ml Teflonlined stainless steel autoclave and heated at 200 °C for 24 h to obtain a black precipitate. Few-layered MoS<sub>2</sub>@SnO<sub>2</sub>@C (FMSC) was obtained by washing with deionized (DI) water and drying at 80 °C for 24 h.

### 1.3 Material characterizations

The morphology of the synthesized products was examined using a field emission scanning electron microscope (FE-SEM, Hitachi SU8010) and a transmission electron

---

microscope (TEM, FEI Talos F200S) equipped with an energy dispersive X-ray spectrometer (EDX) equipment. The phase and chemical states were analyzed using powder X-ray diffractometry (XRD, Bruker BRUKER D8 ADVANCE, Cu K $\alpha$ ,  $\lambda = 0.15406$  nm) and by X-ray photoelectron spectroscopy (XPS, Thermo Scientific K-Alpha). The weight ratio of carbon in the composites was estimated by thermogravimetric analysis (TG-DSC, Netzsch TG 209 F1) at a heating rate of 10 °C min<sup>-1</sup> in air. N<sub>2</sub> sorption measurements were performed on synthesized products using a Belsorp max instrument (Micromeritics ASAP 2460), and BET surface areas were calculated based on these measurements using the Brunauer-Emmer-Teller (BET) theory.

#### 1.4 Electrochemical measurements

Electrochemical measurements were performed using coin cells with CR2025. The working electrodes were prepared by mixing SC and FMSC active materials, black carbon and poly(vinylidene fluoride) (Aldrich) in a ratio of 80:10:10 in N-methyl pyrrolidone. The slurries were evenly spread on a 10 mm thick copper foil with a mass loading of 1-1.5 mg cm<sup>-2</sup>. The copper foil was then heated at 90 °C for 12 h in a vacuum oven. The electrodes were pressed and die-cut into round disks with a diameter of 12 mm. Coin-type cells were assembled in an Ar-filled glove box with sodium metal foil as the counter electrode and a glass microfiber (Whatman) as the separator. The electrolyte was 1 mol L<sup>-1</sup> NaClO<sub>4</sub> in ethylene carbonate/dimethyl carbonate (1:1 by volume) with 5 vol% fluoroethylene carbonate (FEC) addition. The multichannel battery test system (LAND CT3002A) is used to carry out galvanostatic charge/discharge measurements in the voltage range of 0.01-3.0 V. Cyclic

---

voltammetry (CV) and electrochemical impedance spectral (EIS) measurements were conducted on the CHI604E electrochemical workstation. The CV measurements were carried out at a scan rate of  $0.1 \text{ mV s}^{-1}$ , ranging from 0.01 to 3.0 V. The EIS measurements were performed in a wide frequency range of 0.01 Hz  $\sim$  100 kHz.

#### 1.5 calculation method

The weight loss of  $\text{MoS}_2@\text{SnO}_2@\text{C}$  is attributed to the oxidation of  $\text{MoS}_2$  to  $\text{MoO}_3$  and carbon combustion, remaining  $\text{SnO}_2$  and  $\text{MoO}_3$ . Based on TGA data of SC, we can determine that the mass ratio of carbon to  $\text{SnO}_2$  in FMSC is 1.64:1. Let's assume that the mass of  $\text{SnO}_2$ ,  $\text{MoS}_2$  and carbon in FMSC are  $x$ ,  $y$  and  $z$  mg, respectively, with a total mass of  $n$  mg. So the equations are as follows:

$$C=z=1.64x, \text{MoO}_3=\frac{y}{160*144}=0.9y$$

$$x+y+z=n$$

$$x+y+1.64x=100 \quad (1)$$

$$x+0.9y=47.1 \quad (2)$$

When we merge equations (1) and (2), we get: C=51.1%,  $\text{SnO}_2$ =31.2%, and  $\text{MoS}_2$ =17.7%

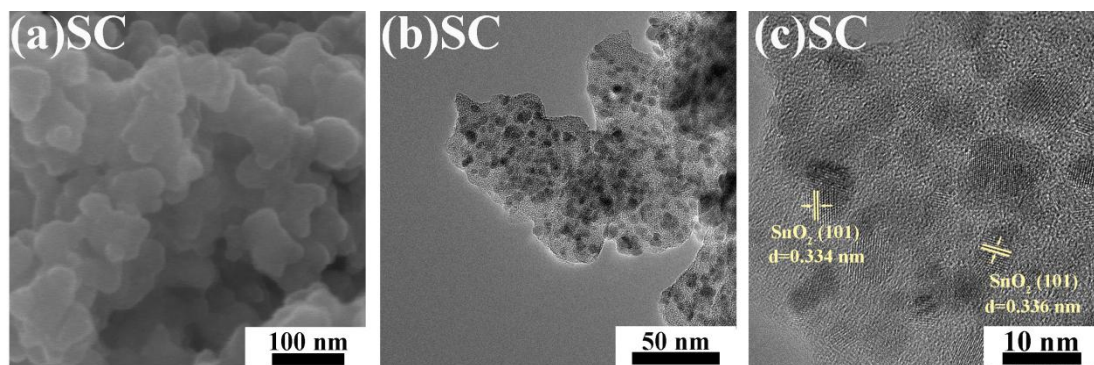

**Fig. S1** (a)SEM, (b)TEM and (c) HRTEM images of SC.

**Table S1** The element composition of FMSC is estimated based on Energy dispersive X-ray spectrometer (EDX).

| Element | C     | Sn    | O     | S    | Mo   |
|---------|-------|-------|-------|------|------|
| W (%)   | 52.50 | 15.43 | 16.11 | 8.07 | 7.89 |

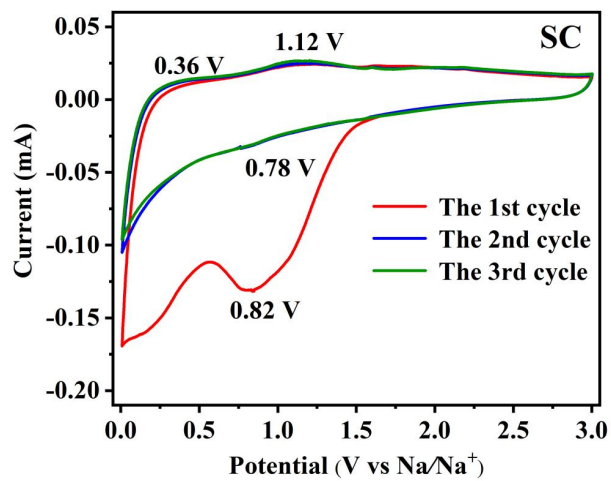

Fig. S2 CV curve of SC electrode.

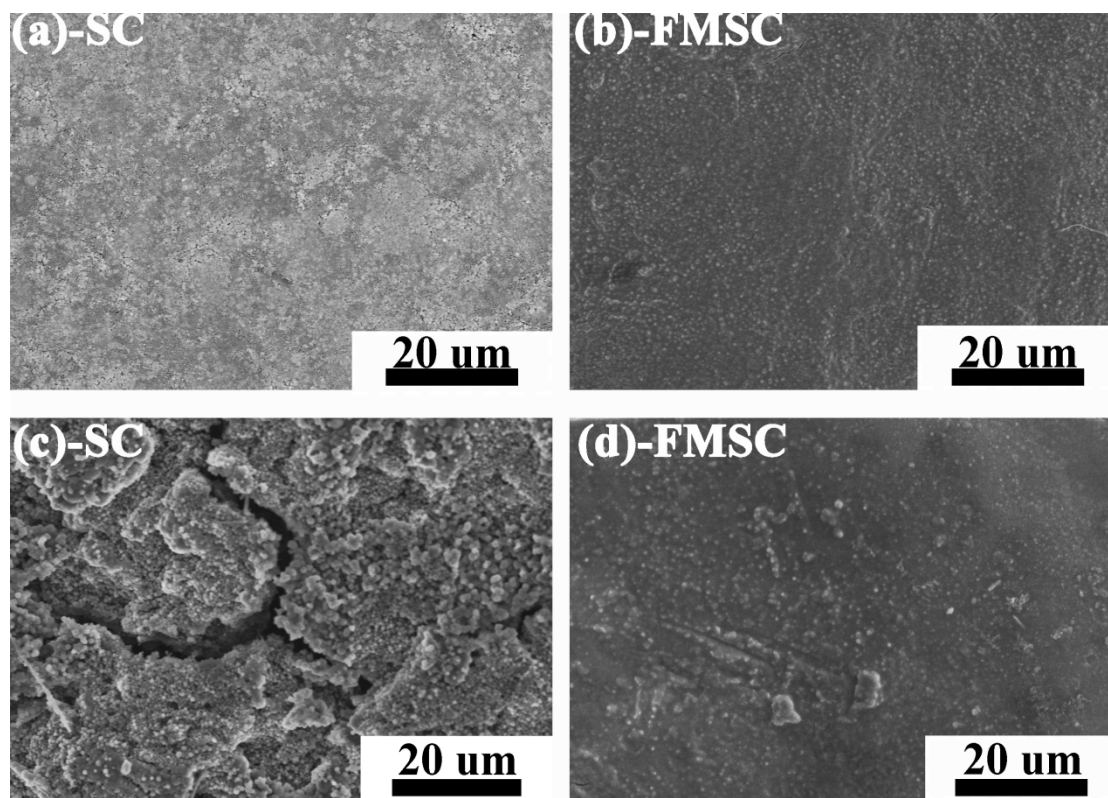

**Fig. S3** The surface morphologies of (a,c) SC and (b,d) FMSC before and after 50 cycles at  $0.1 \text{ A g}^{-1}$

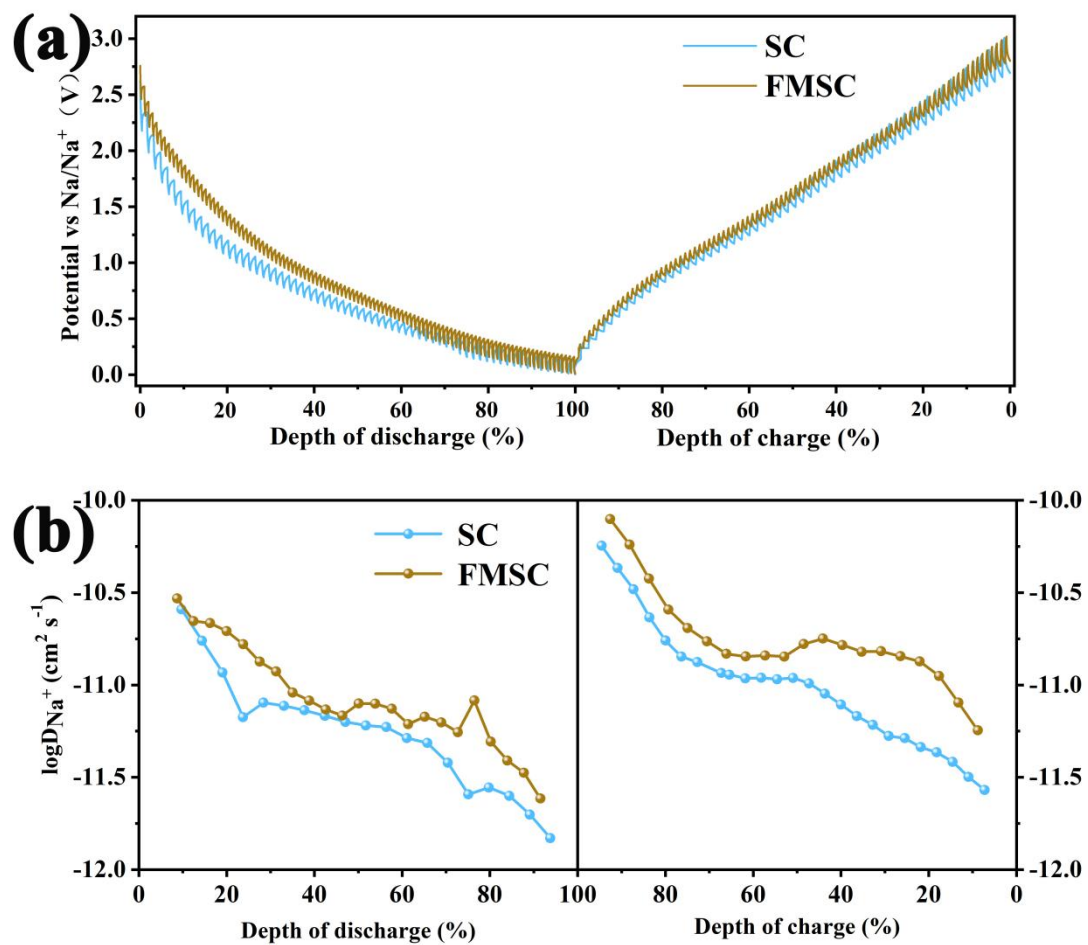

Fig. S4 (a) GITT curves for SC and FMSC electrodes, and (b) comparison of the corresponding  $\text{Na}^+$  diffusivity in SC and FMSC electrodes.
